# Supplementary material for: A novel tumor suppressor function of Kindlin-3 in solid cancer
Source: PubMed Central journal article supplement (PMC4253411; doi:10.18632/oncotarget.2125), 2014-06-18
Supplement: oncotarget-05-8970-s001.pdf [file oncotarget-05-8970-s001.pdf]

# A novel tumor suppressor function of Kindlin-3 in solid cancer

## Supplementary Methods

Supplementary Table 1: Real-time qPCR primers

| Gene name        | Primer sequences                                  |
|------------------|---------------------------------------------------|
| <i>KINDLIN-1</i> | Forward : 5'-AAGCACTTGCGGATATGTACC-3'             |
|                  | Reverse : 5'-TCCTCTTGGATGCCTTGTC-3'               |
|                  | Probe : FAM-AGGTTGGCTAGACTCCTCACGCTCCCT-TAMRA     |
| <i>KINDLIN-2</i> | Forward : 5'-CTCCTGAATGTTTGGTGTCTCC-3'            |
|                  | Reverse : 5'-CTCATCTTGGCTTCAATTAGACTC-3'          |
|                  | Probe : FAM-AGAACAAGCAGATAACAGCGAGAATCTTGGA-TAMRA |
| <i>KINDLIN-3</i> | Forward : 5'-GGCATCGCCAACAACC-3'                  |
|                  | Reverse : 5'-CACTGGCGCATGTTGC-3'                  |
|                  | Probe : FAM-CGACGTGGTCAAGACCTGGCGT-TAMRA          |
| <i>PPIA</i>      | Forward : 5'-GTCAACCCACCGTGTCTT-3'                |
|                  | Reverse : 5'-CTGCTGTCTTTGGGACCTTGT-3'             |
|                  | Probe : FAM-TGGGCCGCGTCTCCTTTGAGCT-TAMRA          |

**Supplementary Table 2: Bisulfite conversion and pyrosequencing:** Sequences for oligonucleotides for PCR amplification and pyrosequencing

| Gene                                         | Size bp | Annealingtemp | PCR primer forward       | PCR primer reverse               | Pyrosequencing primer(s)                                                                 | CpGs                                        |
|----------------------------------------------|---------|---------------|--------------------------|----------------------------------|------------------------------------------------------------------------------------------|---------------------------------------------|
| FERMT3_AMP1<br>chr11: 63972739<br>- 63973057 | 319     | 58            | GTTTAGGTTGGAGTGTAGTGG    | Biotin-CCTAAATTCTCAAATAAAAACC    | AGGTTGGAGTGTAGTGG<br>TTGTTTGTATTTTTAGTAGA<br>TTGTTTGTATTTTTAGTAGA<br>TTAAAGTGTGGGGTTAATA | CpG 1-8<br>CpG 2-8<br>CpG 9-12<br>CpG 13-17 |
| FERMT3_AMP2<br>chr11: 63973963<br>- 63974187 | 225     | 58            | TTGAGTTTGTATTGAGTTTTTTTT | Biotin-ACAACCCTTACTTATACCTTATCAC | TTTTTAAATGAGGAAGG<br>TTTGTGGGTTGGTAGTG                                                   | CpG 1-3<br>CpG 4-7                          |
| FERMT3_AMP3<br>chr11: 63974517<br>- 63974797 | 281     | 61            | GAGTTGTGGGTTGGTATTGAGTA  | Biotin-AATAAACAAACCCTAATAAACCTCC | TTGTGGGTTGGTATTGA<br>GTTTGTAGGATGGGAG<br>GTTGGAGAGAGAGTTTGA                              | CpG 1-4<br>CpG 4-8<br>CpG 9-12              |

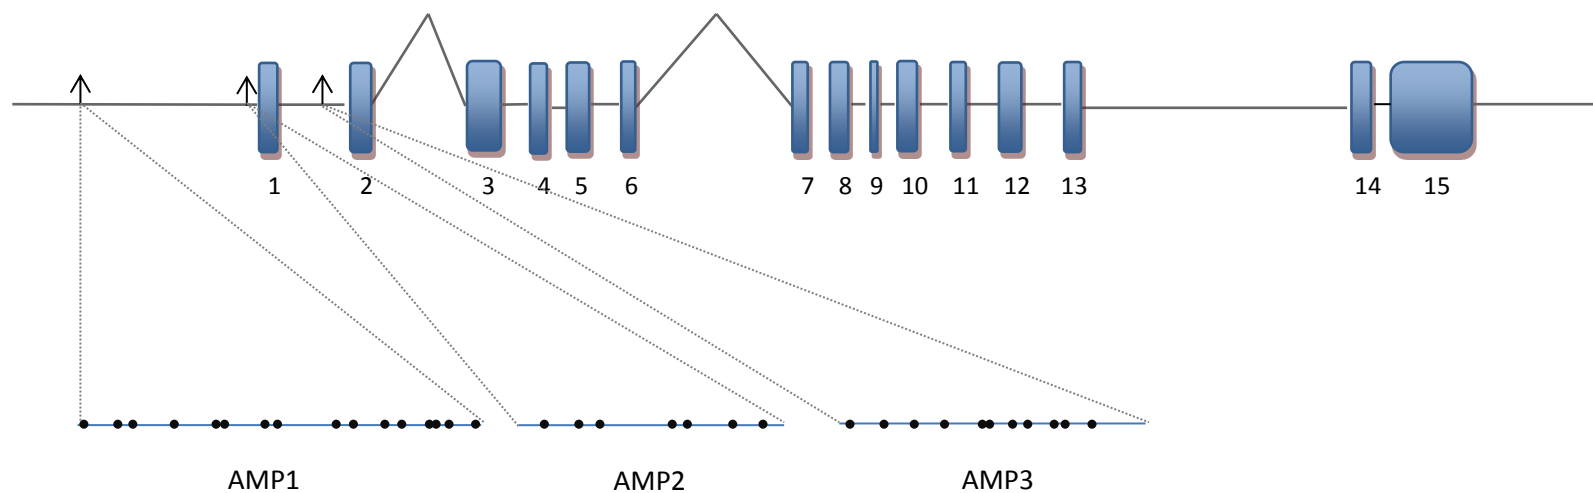

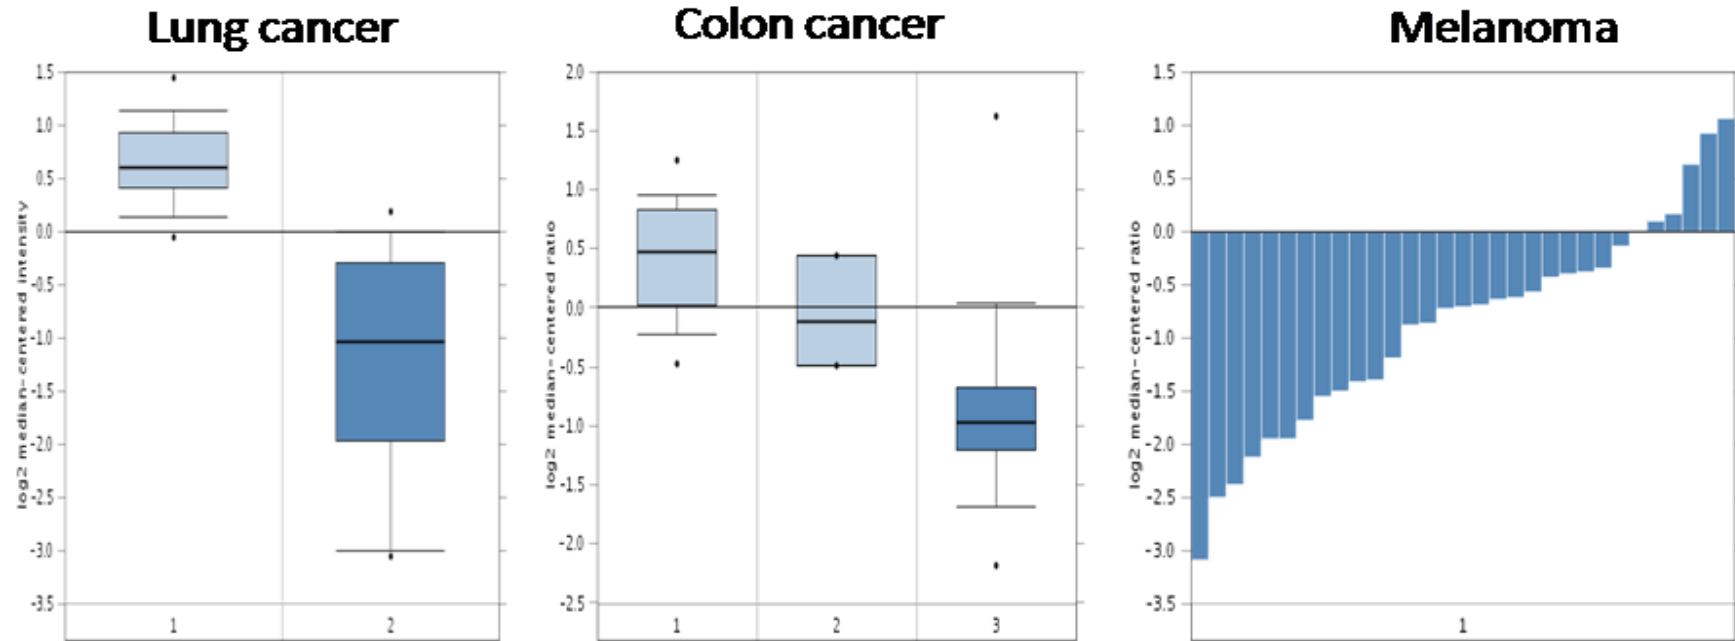

**Supplementary Figure 1: *Kindlin-3* expression and regulation in human tumors**

**a.** Analysis of *Kindlin-3* gene expression in solid human tumors using the Oncomine database (lung, tumors (2) n= 91, normal (1) n= 65; colon, tumors (2, rectum and 3, Rectal Adenocarcinoma) n= 63, normal (1) n= 19; Cutaneous Melanoma (1) n=31). Oncomine™ (Compendia Bioscience, Ann Arbor, MI) was used for analysis and visualization. ([www.oncomine.com](http://www.oncomine.com)).

**a**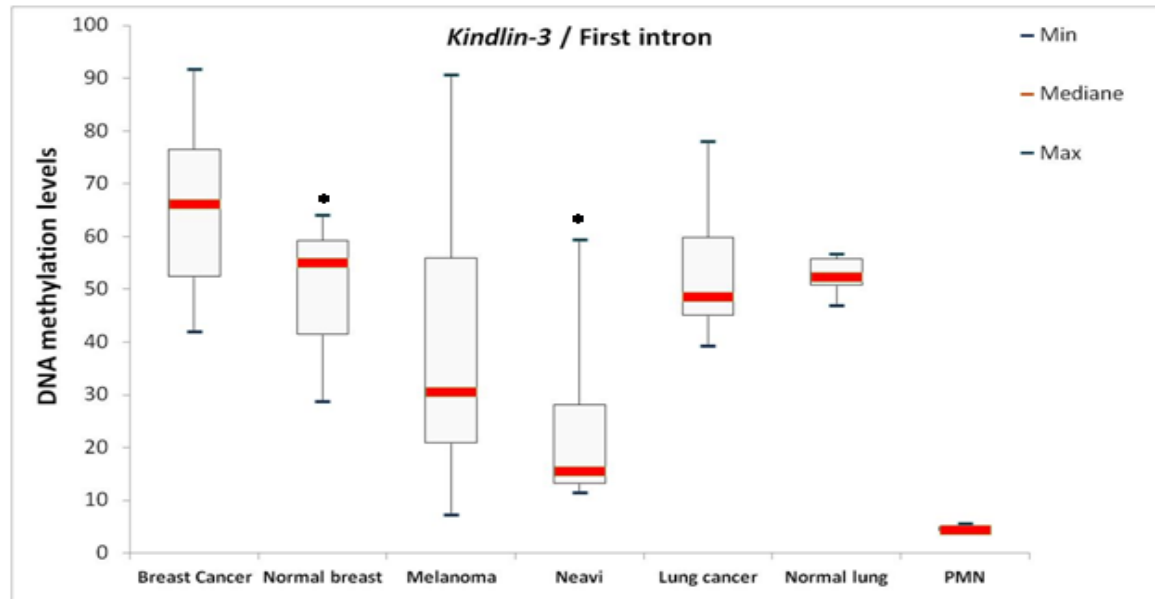**b**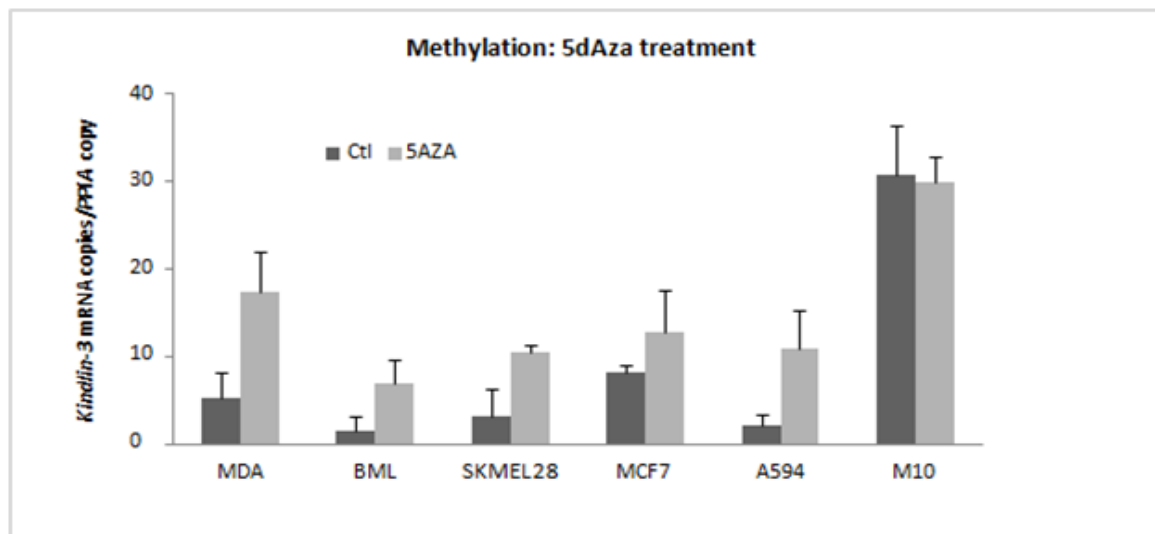

**Supplementary Figure 2: *Kindlin-3* regulation in human tumors**

**a. DNA methylation levels in the CpG island in the first intron of *Kindlin-3* (AMP3) in human normal and cancer tissues** represented by boxplots. \*,  $P < 0.05$

**b. *Kindlin-3* gene expression measured by qRT-PCR in cancer cell lines after treatment with the DNA methylation inhibitor 5-aza-2-deoxycytidine (5-dAza).** Columns, means of three independent experiments carried out in triplicate; bars refer to 95% confidence intervals; \*,  $P < 0.05$

**Supplementary movies 1 and 2:** *Kindlin-3* knockdown inhibits cell adhesion and promotes directed cell migration. Frames were taken every 3min for 24 hrs. Note that cells transfected with *Kindlin-3* shRNA migrate faster and develop abnormal stress-fiber structures exhibiting abundant filopodia (actin in red) in the direction of migration. By contrast, more control cells display a normal distribution of filamentous actin and appear to be more firmly adherent.

**Supplementary movies 3 and 4:** Control or *Kindlin-3* shRNA SKMEL28 cells were imaged during adhesion. Live cell imaging was performed with Nikon BioStation IM Live Cell Recorder. Frames were taken every 3min for 24 hrs. Note that *Kindlin-3* shRNA transfection decreased cell adhesion.
