# Supplementary material for: A novel tumor suppressor function of Kindlin-3 in solid cancer
Source: PubMed Central journal article supplement (PMC4253411; doi:10.18632/oncotarget.2125), 2014-06-18
Supplement: oncotarget-05-8970-s002.pdf [file oncotarget-05-8970-s002.pdf]

# A novel tumor suppressor function of Kindlin-3 in solid cancer

## Supplementary data

### Supplementary Table 1

**The Cancer genome Atlas (TCGA) analysis of 1123 tumor patient samples.** Tumor samples harboring homozygous deletion of the chromosome region 11q13.1 (including *Kindlin-3*) in the TCGA dataset (TCGA; <http://cancergenome.nih.gov/>; Accessed the 09<sup>th</sup> June 2012). Data were obtained using Genome-Wide Human SNP Array 6.0 (Affymetrix®) and homozygous deletion was defined by a Log2 Ratio <-0.5.

| <b>Tumor type</b>                 | <b>Homozygously deleted (n)</b> | <b>Homozygously deleted (%)</b> |
|-----------------------------------|---------------------------------|---------------------------------|
| Breast invasive carcinoma         | 11/93                           | 12%                             |
| Rectum adenocarcinoma             | 3/50                            | 6%                              |
| Lung adenocarcinoma               | 1/21                            | 5%                              |
| Glioblastoma                      | 11/372                          | 3%                              |
| Ovarian serous cystadenocarcinoma | 17/494                          | 3%                              |
| Colon adenocarcinoma              | 2/137                           | 1%                              |
